# Supplementary material for: Identification of Antiviral Compounds against Monkeypox Virus Profilin-like Protein A42R from Plantago lanceolata
Source: MDPI journal article supplement (doi:10.3390/molecules27227718), 2022-11-09
Supplement: s1 [file s1]

# Identification of antiviral compounds against Monkeypox virus profilin-like protein A42R from *Plantago lanceolata*

Leena H. Bajrai<sup>1,2\*</sup>, Azzah S. Alharbi<sup>2,3</sup>, Mai M. El-Day<sup>2,4</sup>, Abrar G. Bafaraj<sup>2,5</sup>, Vivek Dhar Dwivedi<sup>2,6\*</sup> and Esam I. Azhar<sup>2,4\*</sup>

<sup>1</sup> Biochemistry Department, Faculty of Sciences, King Abdulaziz University, Jeddah 21362, Saudi Arabia

<sup>2</sup> Special Infectious Agents Unit—BSL3, King Fahd Medical Research Center, King Abdulaziz University, Jeddah 21362, Saudi Arabia

<sup>3</sup> Department of Medical Microbiology and Parasitology, Faculty of Medicine, King Abdulaziz University, Jeddah 21362, Saudi Arabia

<sup>4</sup> Department of Medical Laboratory Sciences, Faculty of Applied Medical Sciences, King Abdulaziz University, Jeddah 21362, Saudi Arabia

<sup>5</sup> Makkah Regional Lab, Ministry of Health, Makkah, Saudi Arabia

<sup>6</sup> Bioinformatics Research Division, Quanta Calculus, Pvt. Ltd., Greater Noida 201310, India

\* Correspondence: lbajrai@kau.edu.sa; vivek\_bioinformatics@yahoo.com; eazhar@kau.edu.sa

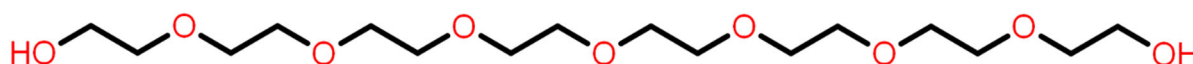

**Figure S1-** control 3,6,9,12,15,18,21-HEPTAOXATRICOSANE-1,23-DIOL

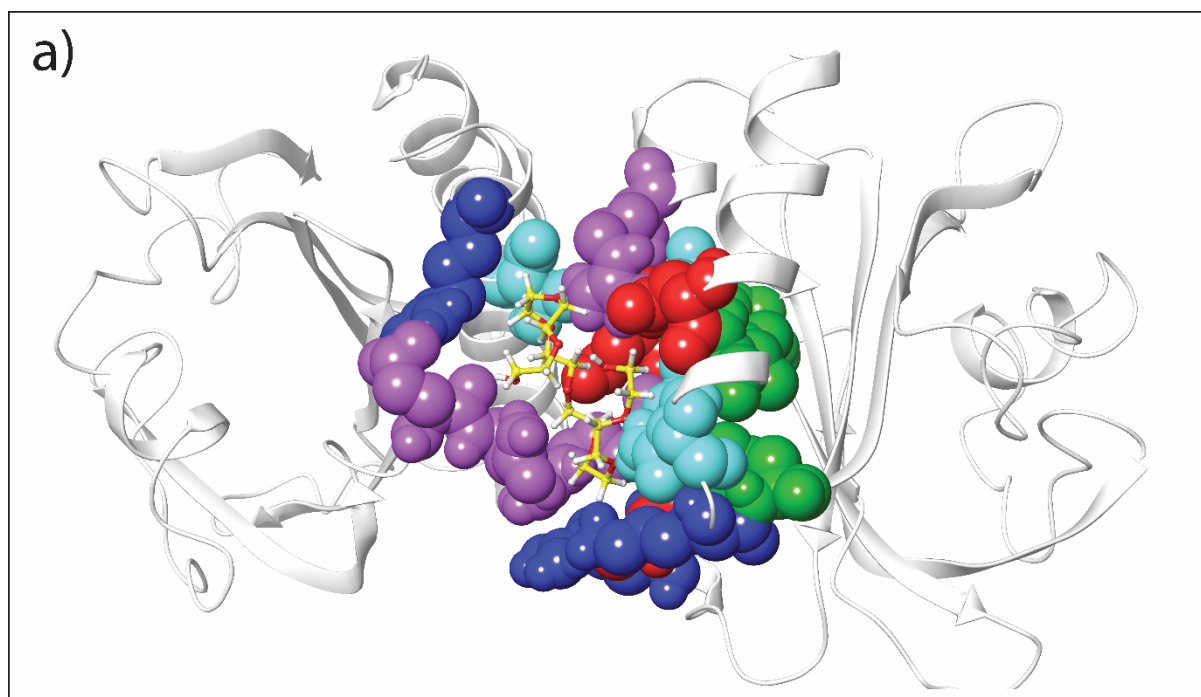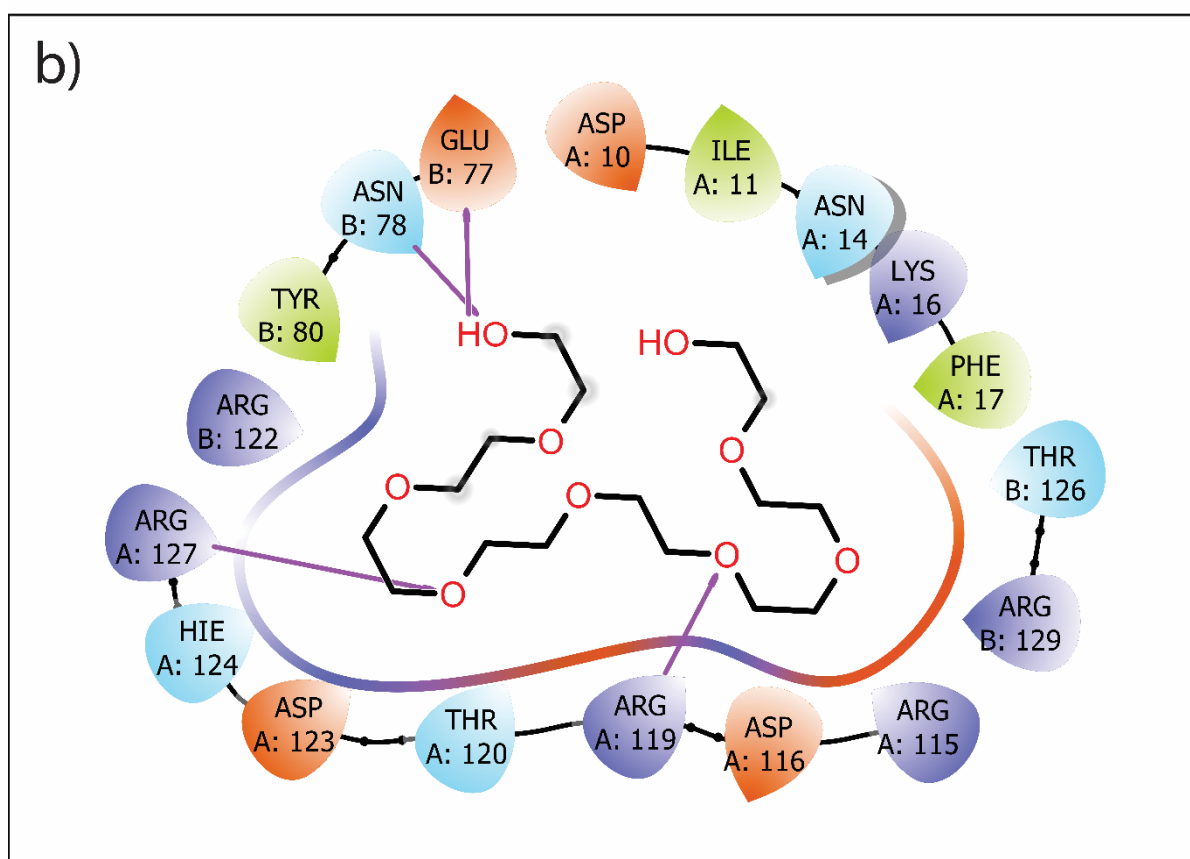

**Figure S2-** 2d and 3d pose of control

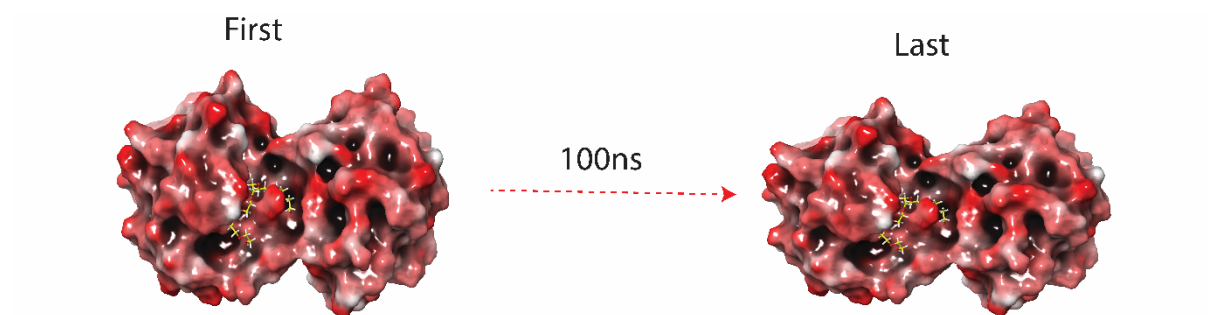

**Figure S3** – first and last pose of control

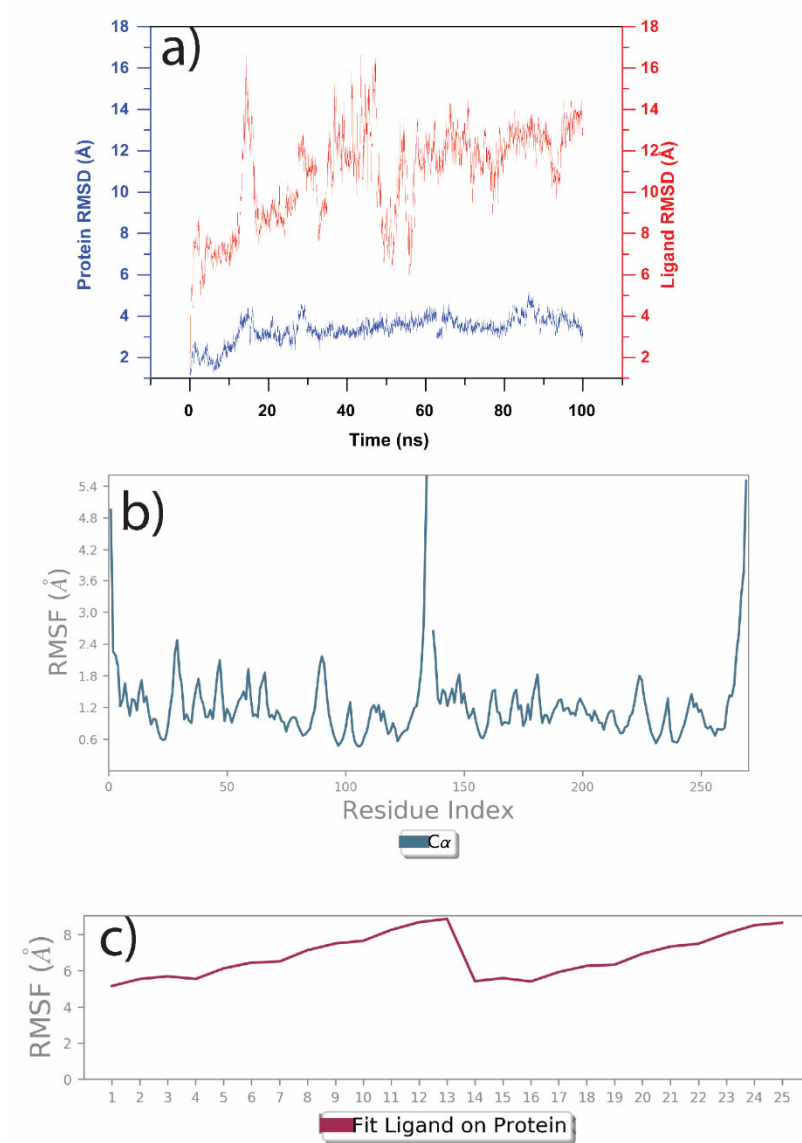

**Figure S4-** a) RMSD of control b) RMSF plot of protein- control c) RMSF Plot of ligand-control

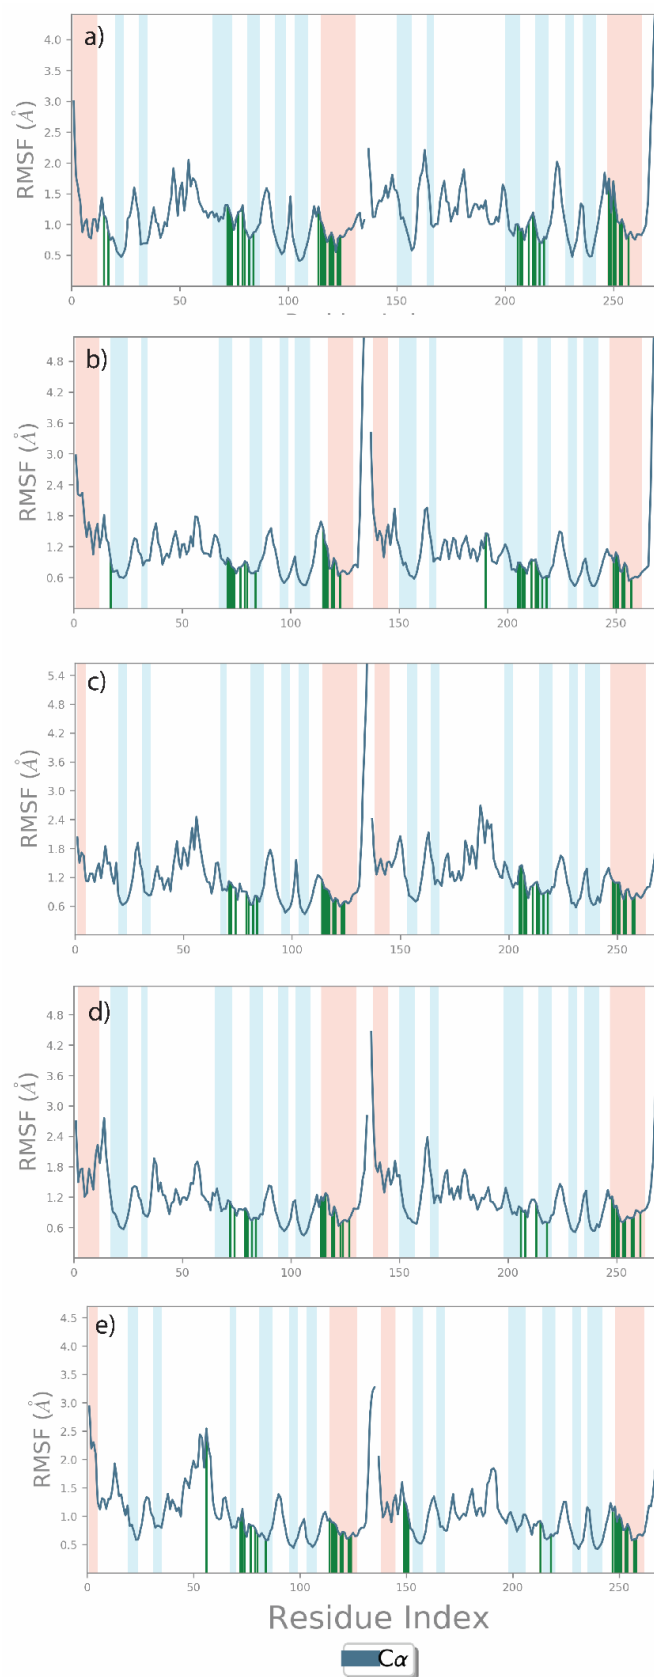

**Figure S5.** RMSF plots for protein docked with natural compounds, i.e., a) Luteolin 7,3'-diglucuronide b) Luteolin 7-glucuronide-3'-glucoside c) Plantagoside d) Narcissoside e) (alphaE,8S,9R)-N-(3,4-Dihydroxyphenethyl)-8-[(3,4-dihydroxyphenethyl)carbamoyl]-9-(1,3-

benzodioxole-5-yl)-3a alpha,7a alpha-ethano-1,3-benzodioxole-5-acrylamide as function of 100 ns simulation interval.

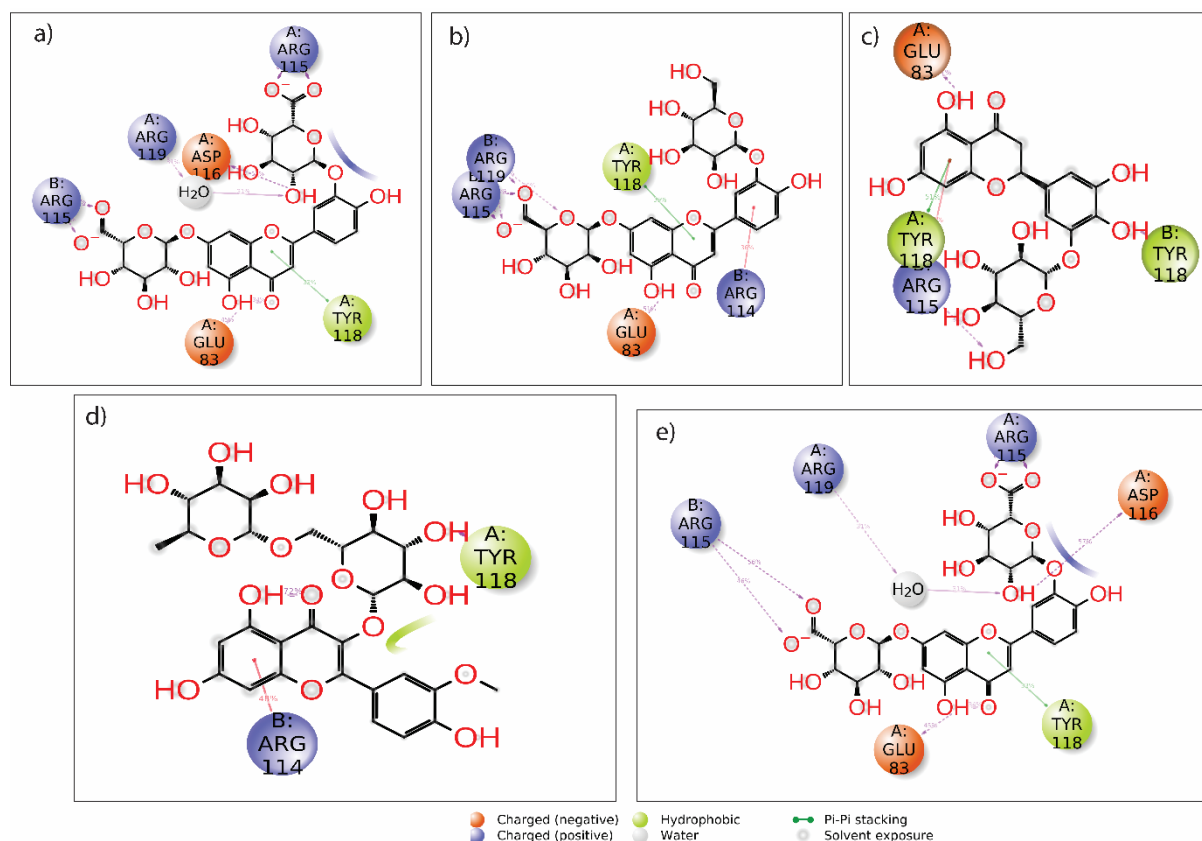

**Figure S6.** Ligand protein contact of PE8 and selected natural compounds, i.e., (a) Luteolin 7,3'-diglucuronide b) Luteolin 7-glucuronide-3'-glucoside c) Plantagoside d) Narcissoside e) (alphaE,8S,9R)-N-(3,4-Dihydroxyphenethyl)-8-[(3,4-dihydroxyphenethyl)carbamoyl]-9-(1,3-benzodioxole-5-yl)-3aalpha,7aalpha-ethano-1,3-benzodioxole-5-acrylamide fit on protein were extracted from 100 ns MD simulation trajectories of respective docked complexes.

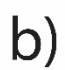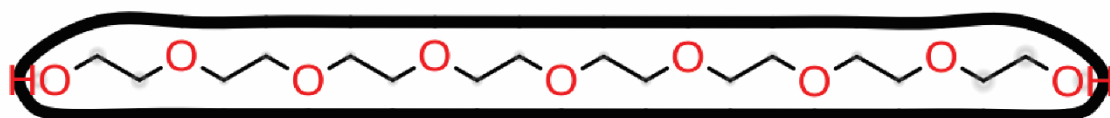

**Figure S7** a) protein-ligand interaction of control b) protein-ligand contact of control

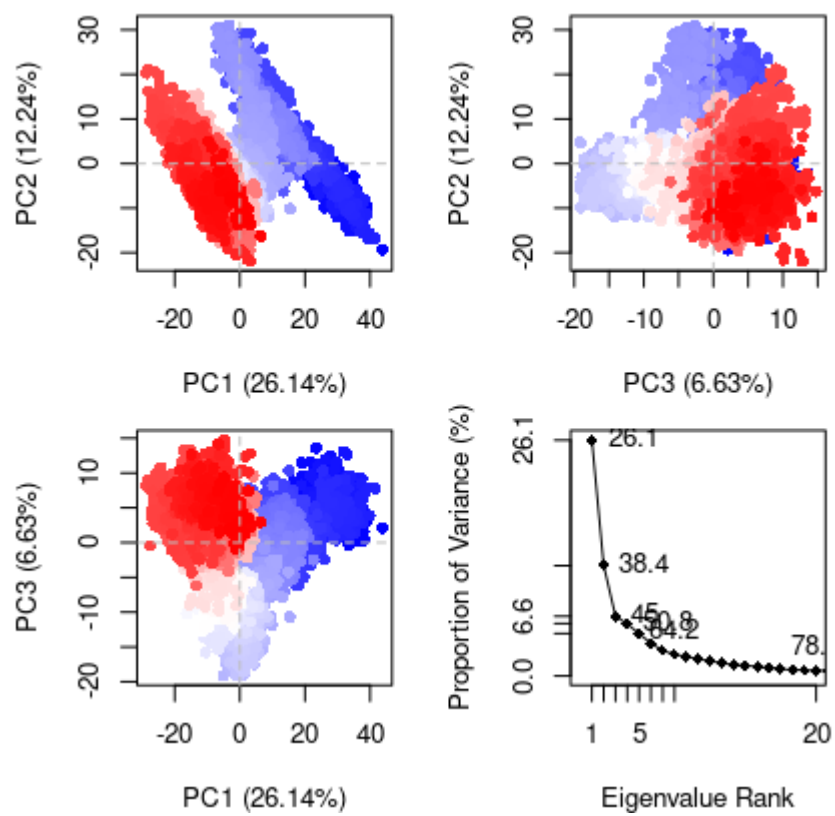

**Figure S8.** PCA of control

**Table S1.** ADME analysis of all the selected compounds.

| <b>Molecule</b>               | <b>44258091</b> | <b>44258090</b>    | <b>174157</b> | <b>5481663</b>     | <b>101131595</b>   |
|-------------------------------|-----------------|--------------------|---------------|--------------------|--------------------|
|                               | C27H26O1        |                    | C21H22        |                    |                    |
| Formula                       | 8               | C27H28O17          | O12           | C28H32O16          | C36H34N2O10        |
| MW                            | 638.48          | 624.5              | 466.39        | 624.54             | 654.66             |
| #Heavy atoms                  | 45              | 44                 | 33            | 44                 | 48                 |
| #Aromatic heavy atoms         | 16              | 16                 | 12            | 16                 | 18                 |
| Fraction Csp3                 | 0.37            | 0.41               | 0.38          | 0.46               | 0.28               |
| #Rotatable bonds              | 7               | 7                  | 4             | 7                  | 12                 |
| #H-bond acceptors             | 18              | 17                 | 12            | 16                 | 10                 |
| #H-bond donors                | 10              | 10                 | 8             | 9                  | 6                  |
| MR                            | 141.48          | 140.87             | 107.74        | 145.85             | 171.93             |
| TPSA                          | 303.57          | 286.5              | 206.6         | 258.43             | 176.04             |
| iLOGP                         | 1.32            | 1.16               | 1.65          | 2.62               | 3.58               |
| XLOGP3                        | 0.15            | -0.1               | -0.06         | -0.01              | 2.9                |
| WLOGP                         | -2.59           | -2.68              | -0.93         | -1.38              | 3.2                |
| MLOGP                         | -4.13           | -4.15              | -2.4          | -3.69              | 1.26               |
| Silicos-IT Log P              | -3.12           | -2.68              | -1.06         | -1.55              | 3.8                |
| Consensus Log P               | -1.67           | -1.69              | -0.56         | -0.8               | 2.95               |
| ESOL Log S                    | -3.69           | -3.46              | -2.7          | -3.51              | -5.21              |
| ESOL Solubility (mg/ml)       | 0.129           | 2.19E-01           | 9.33E-01      | 1.92E-01           | 4.02E-03           |
| ESOL Solubility (mol/l)       | 0.000202        | 3.50E-04           | 2.00E-03      | 3.07E-04           | 6.15E-06           |
| ESOL Class                    | Soluble         | Soluble            | Soluble       | Soluble            | Moderately soluble |
| Ali Log S                     | -6.08           | -5.46              | -3.83         | -4.97              | -6.26              |
| Ali Solubility (mg/ml)        | 0.000529        | 2.15E-03           | 6.94E-02      | 6.73E-03           | 3.62E-04           |
|                               | 0.0000008       |                    |               |                    |                    |
| Ali Solubility (mol/l)        | 28              | 3.44E-06           | 1.49E-04      | 1.08E-05           | 5.53E-07           |
| Ali Class                     | Poorly soluble  | Moderately soluble | Soluble       | Moderately soluble | Poorly soluble     |
| Silicos-IT LogSw              | 0.65            | 0.17               | -0.52         | -0.97              | -6.99              |
| Silicos-IT Solubility (mg/ml) | 2820            | 9.22E+02           | 1.40E+0       | 6.66E+01           | 6.75E-05           |
| Silicos-IT Solubility (mol/l) | 4.42            | 1.48E+00           | 2.99E-01      | 1.07E-01           | 1.03E-07           |
| Silicos-IT class              | Soluble         | Soluble            | Soluble       | Soluble            | Poorly soluble     |
| GI absorption                 | Low             | Low                | Low           | Low                | Low                |
| BBB permeant                  | No              | No                 | No            | No                 | No                 |
| Pgp substrate                 | Yes             | Yes                | No            | Yes                | No                 |
| CYP1A2 inhibitor              | No              | No                 | No            | No                 | No                 |
| CYP2C19 inhibitor             | No              | No                 | No            | No                 | No                 |
| CYP2C9 inhibitor              | No              | No                 | No            | No                 | No                 |
| CYP2D6 inhibitor              | No              | No                 | No            | No                 | No                 |
| CYP3A4 inhibitor              | No              | No                 | No            | No                 | No                 |



|                       |        |        |       |        |       |
|-----------------------|--------|--------|-------|--------|-------|
| log Kp (cm/s)         | -10.09 | -10.18 | -9.19 | -10.12 | -8.23 |
| Lipinski #violations  | 3      | 3      | 2     | 3      | 3     |
| Ghose #violations     | 4      | 4      | 1     | 4      | 3     |
| Veber #violations     | 1      | 1      | 1     | 1      | 2     |
| Egan #violations      | 1      | 1      | 1     | 1      | 1     |
| Muegge #violations    | 4      | 4      | 3     | 4      | 3     |
| Bioavailability Score | 0.11   | 0.11   | 0.17  | 0.17   | 0.17  |
| PAINS #alerts         | 0      | 0      | 1     | 0      | 1     |
| Brenk #alerts         | 0      | 0      | 1     | 0      | 2     |
| Leadlikeness          |        |        |       |        |       |
| #violations           | 1      | 1      | 1     | 1      | 2     |
| Synthetic             |        |        |       |        |       |
| Accessibility         | 6.29   | 6.33   | 5.14  | 6.64   | 6.91  |
